# Supplementary material for: Cnidarian phylogenetic relationships as revealed by mitogenomics
Source: PubMed Central journal article supplement (PMC3598815; doi:10.1186/1471-2148-13-5), 2013-01-09
Supplement: 1471-2148-13-5-S3.pdf [file 1471-2148-13-5-S3.pdf]

# Placozoa

# Porifera

# Hexacorallia

# Octocorallia

# Coronatae

# Staurozoa

# Cubozoa

# Hydrozoa

# Discomedusae

0.53/0.99/93

0.96/-/-

0.98/-/45

0.97/1/98

1/1/72

0.82/-/-

1/1/79

0.99/1/86

0.99/0.99/72

0.90/0.99/70

0.92/0.99/85

0.87/0.87/79

0.97/-/-

0.98/0.57/-

0.4

0.99/1/92

0.50/-/52

*Ceriantheopsis americanus* 19

1

2

3

4

5

6

7

6

6

20

8

9

10

11

12

13

14

15

16

17

18

*Savalia savaglia*

*Palythoa* sp

*Nematostella* sp

*Metridium senile*

*Cirripathes lutkeni*

*Chrysopathes formosa*

*Leiopathes glaberrima*

*Discosoma* sp

*Rhodactis* sp

*Ricordea florida*

*Acropora tenuis*

*Montipora cactus*

*Agaricia humilis*

*Porites porites*

*Lophelia pertusa*

*Astrangia* sp

*Montastraea annularis*

*Madracis mirabilis*

*Stylophora pistillata*

*Briareum asbestinum*

*Renilla mulleri*

*Stylatula elongata*

*Acanella eburnea*

*Corallium konojoi*

*Heliopora coerulea*

*Euplexaura crassa*

*Scleronephthya gracillimum*

*Pseudopterogorgia bipinnata*

*Sinularia peculiaris*

*Linuche unguiculata*

*Craterolophus convolvulus*

*Haliclystus sanjuanensis*

*Lucernaria janetae*

*Alatina moseri*

*Carukia barnesi*

*Carybdea xaymacana*

*Chironex fleckeri*

*Chiropsalmus quadrumanus*

*Cubaia aphrodite*

*Clava multicornis*

*Nemopsis bachei*

*Laomedea flexuosa*

*Millepora platyphylla*

*Pennaria tiarella*

*Ectopleura larynx*

*Hydra oligactis*

*H. magnipapillata*

*Hydra vulgaris*

*Cyanea capillata*

*Chrysaora quinquecirrha*

*Chrysaora* sp

*Pelagia noctiluca*

*Aurelia aurita A*

*Aurelia aurita B*

*Rhizostoma pulmo*

*Cassiopea andromeda*

*Cassiopea frondosa*

*Catostylus mosaicus*
