# Supplementary material for: Cnidarian phylogenetic relationships as revealed by mitogenomics
Source: PubMed Central journal article supplement (PMC3598815; doi:10.1186/1471-2148-13-5), 2013-01-09
Supplement: 1471-2148-13-5-S4.pdf [file 1471-2148-13-5-S4.pdf]

---

|                                  | <b>AliMGred</b> |      |      |
|----------------------------------|-----------------|------|------|
|                                  | AU              | KH   | SH   |
| Acraspeda                        | 0.75            | 0.66 | 0.90 |
| Scyphozoa + Cubozoa + Hydrozoa*  | 0.23            | 0.22 | 0.39 |
| Scyphozoa + Cubozoa + Staurozoa* | 0.08            | 0.18 | 0.26 |
| Scyphozoa + Staurozoa            | 0.02            | 0.02 | 0.20 |

---

---
