# Supplementary material for: Cnidarian phylogenetic relationships as revealed by mitogenomics
Source: PubMed Central journal article supplement (PMC3598815; doi:10.1186/1471-2148-13-5), 2013-01-09

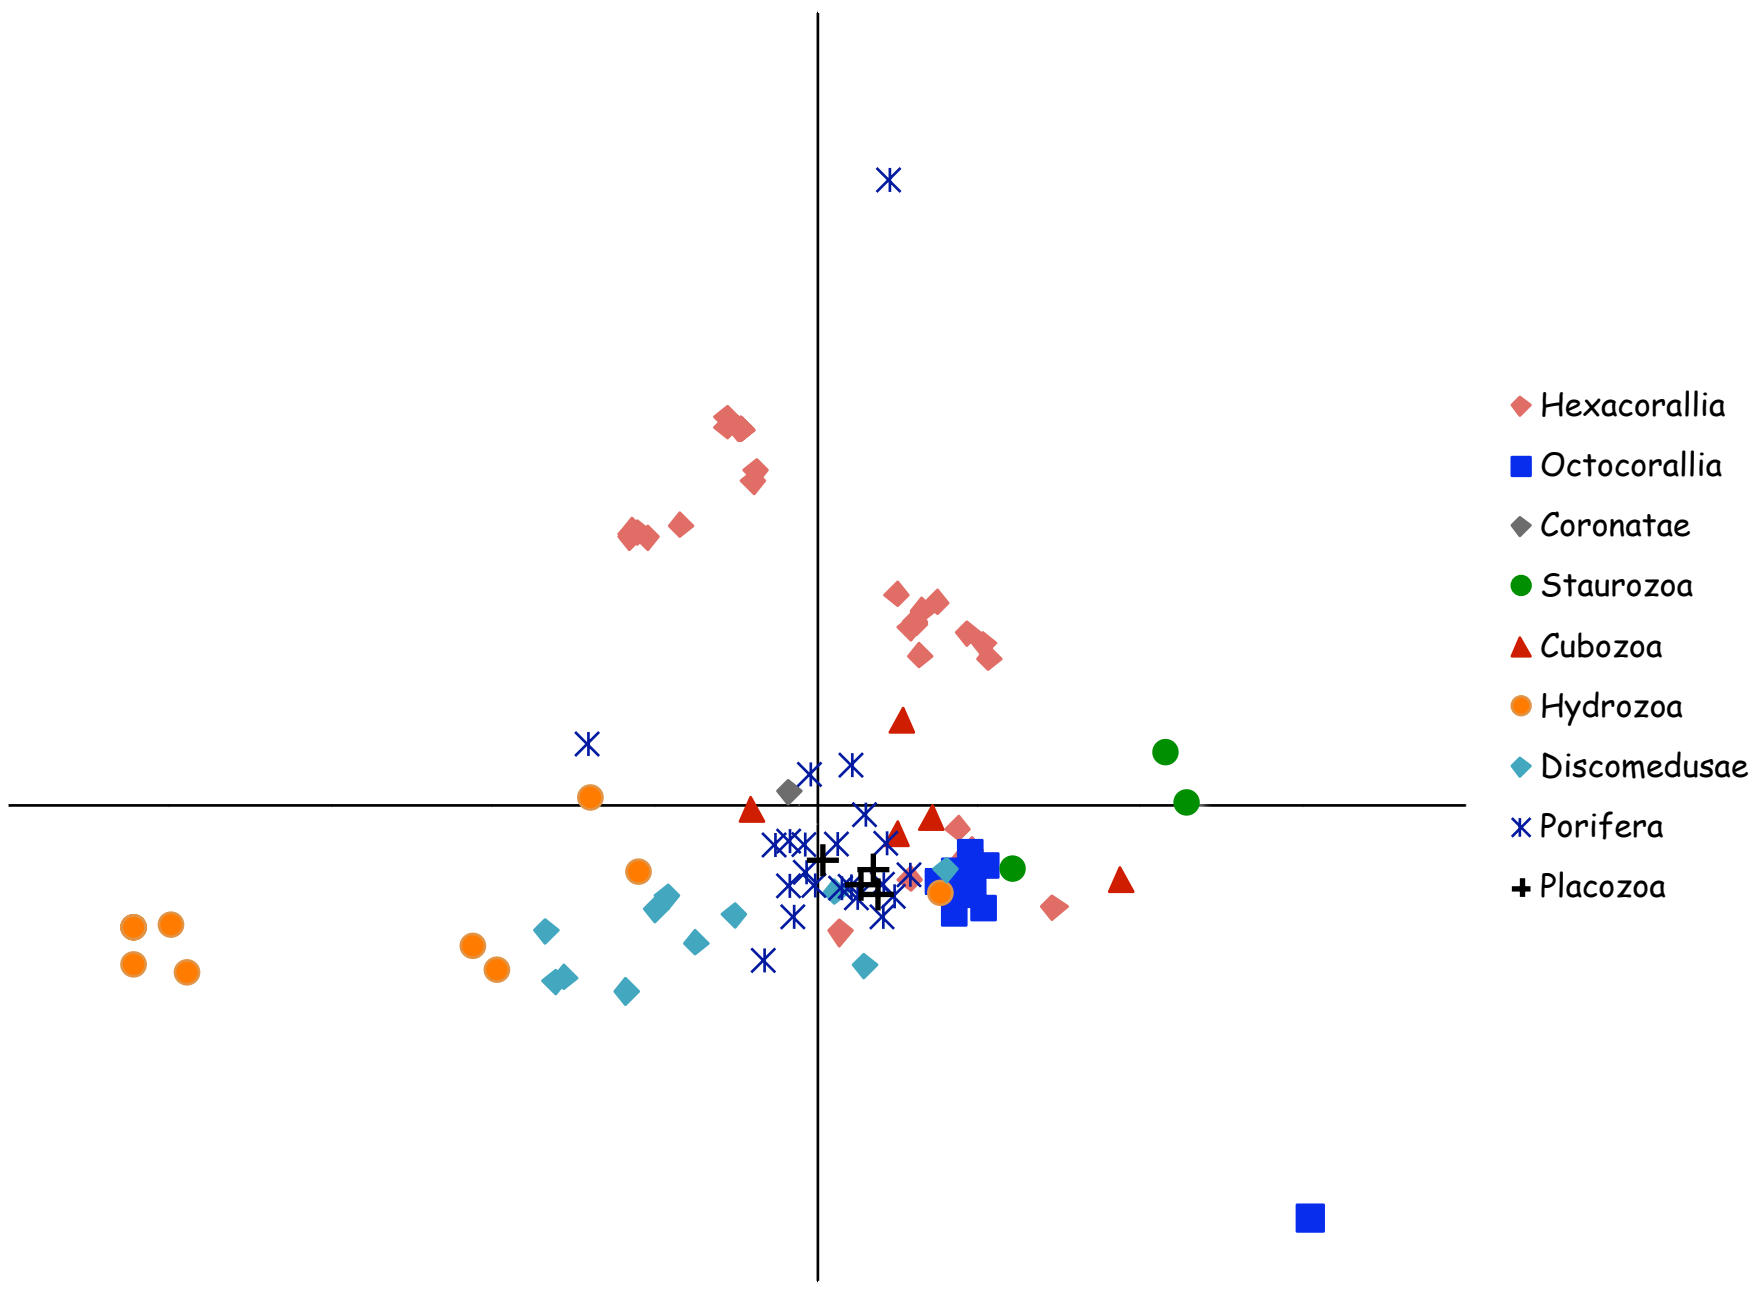

Supplement: 1471-2148-13-5-S5.pdf [file 1471-2148-13-5-S5.pdf]
