# Supplementary material for: Cnidarian phylogenetic relationships as revealed by mitogenomics
Source: PubMed Central journal article supplement (PMC3598815; doi:10.1186/1471-2148-13-5), 2013-01-09
Supplement: 1471-2148-13-5-S7.pdf [file 1471-2148-13-5-S7.pdf]

|                  | <b>1</b> | <b>2</b> | <b>3</b> | <b>4</b> | <b>5</b> | <b>6</b> | <b>7</b> | <b>8</b> | <b>9</b> | <b>10</b> |
|------------------|----------|----------|----------|----------|----------|----------|----------|----------|----------|-----------|
| Actiniaria       | 1        | 0        | 0        | 0        | 0        | 0        | 0        | 0        | 0        | 1         |
| Antipatharia     | 1        | 0        | 0        | 0        | 0        | 0        | 0        | 0        | 0        | 1         |
| Corallimorpharia | 1        | 0        | 0        | 0        | 0        | 0        | 0        | 0        | 0        | 1         |
| Scleractinia     | 1        | 0        | 0        | 0        | 0        | 0        | 0        | 0        | 0        | 1         |
| Zoantharia       | 0        | 0        | 0        | 0        | 0        | 0        | 0        | 0        | 0        | 1         |
| Ceriantharia     | 0        | 0        | 0        | 0        | 0        | 0        | 0        | 0        | 0        | 2         |
| Alcyonacea       | 0        | 0        | 0        | 0        | 0        | 0        | 0        | 0        | 0        | 1         |
| Helioporacea     | 0        | 0        | 0        | 0        | 0        | 0        | 0        | 0        | 0        | 1         |
| Pennatulacea     | 0        | 0        | 0        | 0        | 0        | 0        | 0        | 0        | 0        | 1         |
| Carybdeida       | 1        | 1        | 0        | 0        | 1        | 0        | ?        | 0        | 1        | 0         |
| Chirodropida     | 1        | 1        | 0        | 0        | 1        | 0        | ?        | 0        | 1        | 0         |
| Limnomedusae     | 1        | 1        | 1        | 0        | 0        | 0        | 1        | 1        | 0        | 2         |
| Aplanulata       | 1        | 1        | 1        | 0        | 0        | 0        | 1        | 1        | 0        | 2         |
| Capitata         | 1        | 1        | 1        | 0        | 0        | 0        | 1        | 1        | 0        | 2         |
| Filifera III     | 1        | 1        | 1        | 0        | 0        | 0        | 1        | 1        | 0        | 2         |
| Filifera IV      | 1        | 1        | 1        | 0        | 0        | 0        | 1        | 1        | 0        | 2         |
| Leptothecata     | 1        | 1        | 1        | 0        | 0        | 0        | 1        | 1        | 0        | 2         |
| Coronatae        | 1        | 1        | 0        | 1        | 1        | 1        | 1        | 0        | 0        | 0         |
| Rhizostomeae     | 1        | 1        | 0        | 1        | 1        | 1        | 1        | 1        | 0        | 0         |
| Semaeostomeae    | 1        | 1        | 0        | 1        | 1        | 1        | 1        | 1        | 0        | 0         |
| Stauromedusae    | 1        | 0        | 0        | 0        | 1        | 0        | 0        | 0        | 1        | 0         |
